# Supplementary material
Source: PubMed Central journal article supplement (PMC5617351)

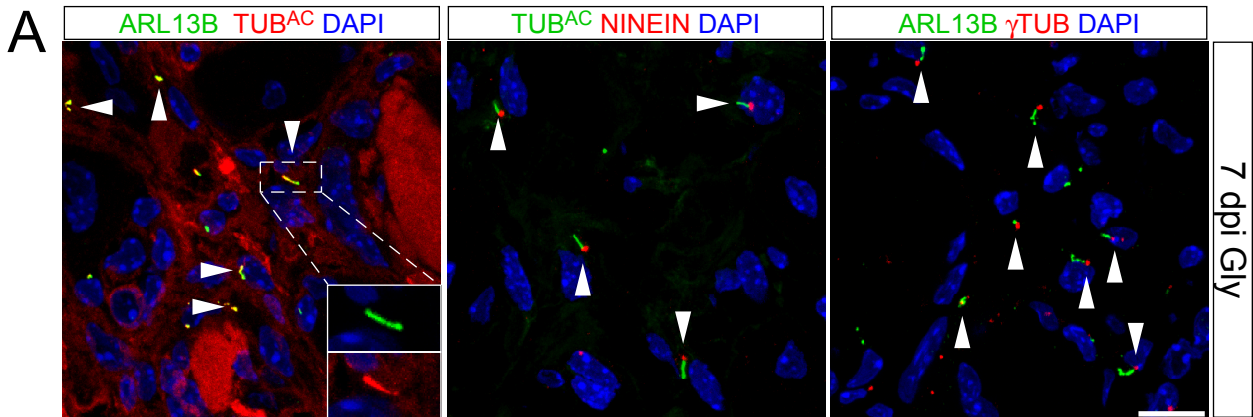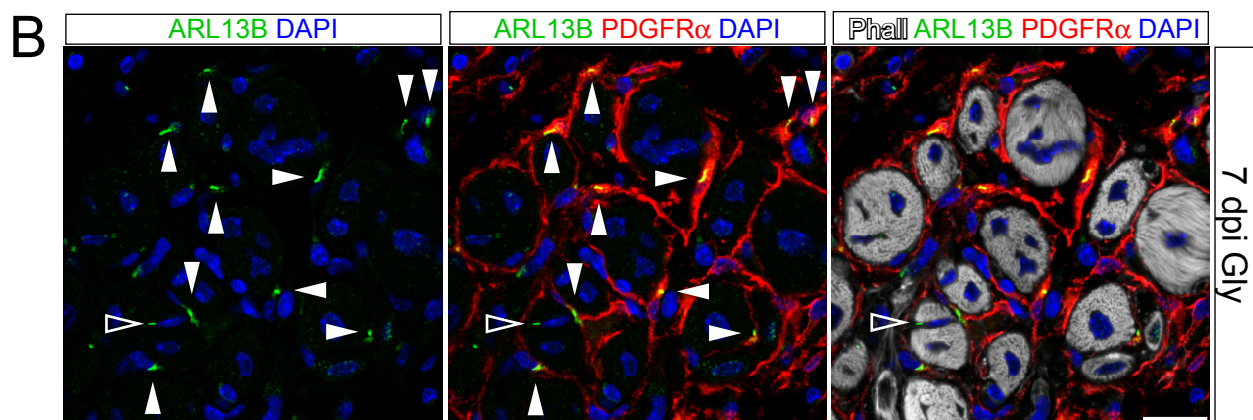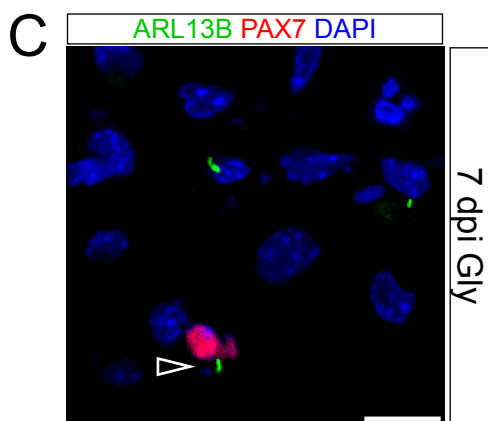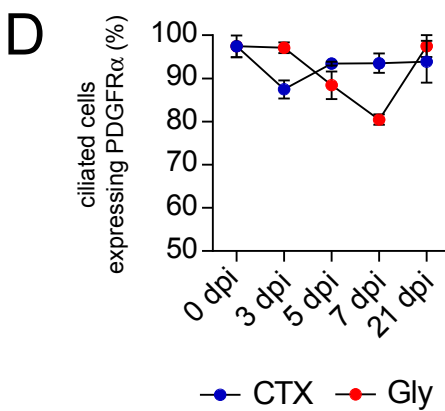

Supplement: NIHMS889975-supplement-1.pdf [file NIHMS889975-supplement-1.pdf]

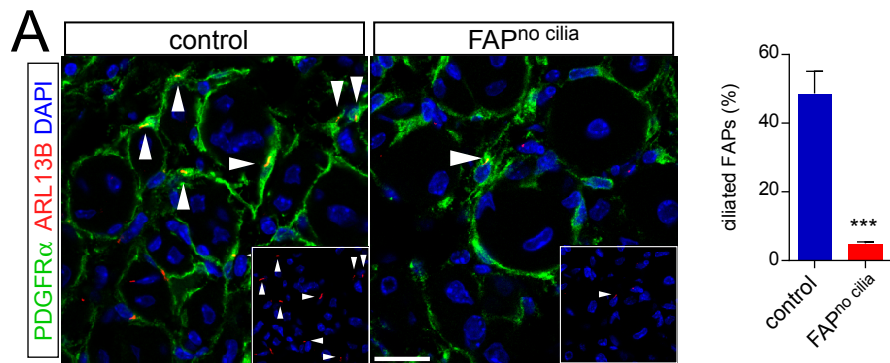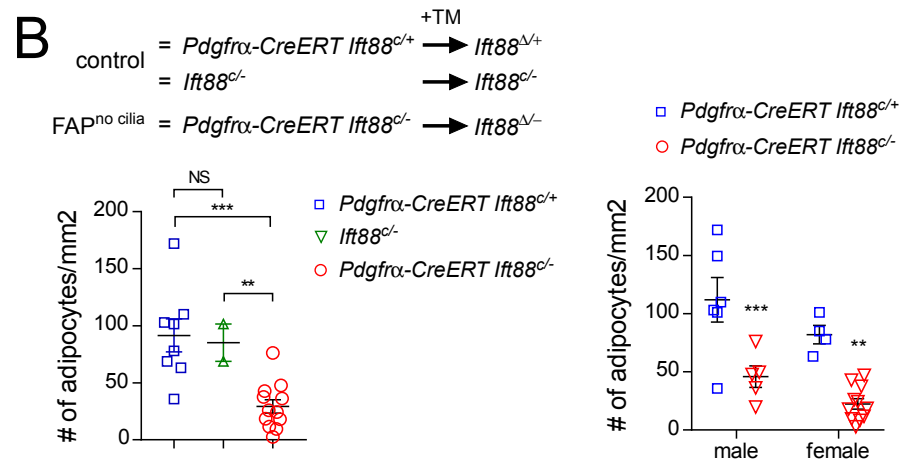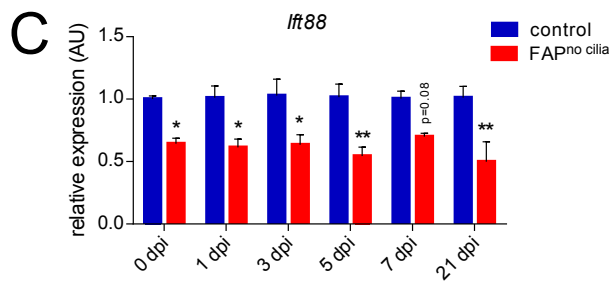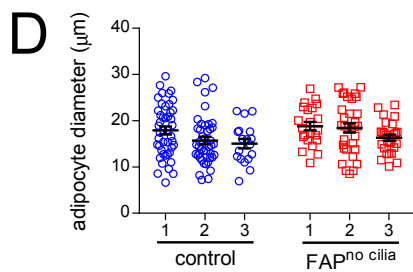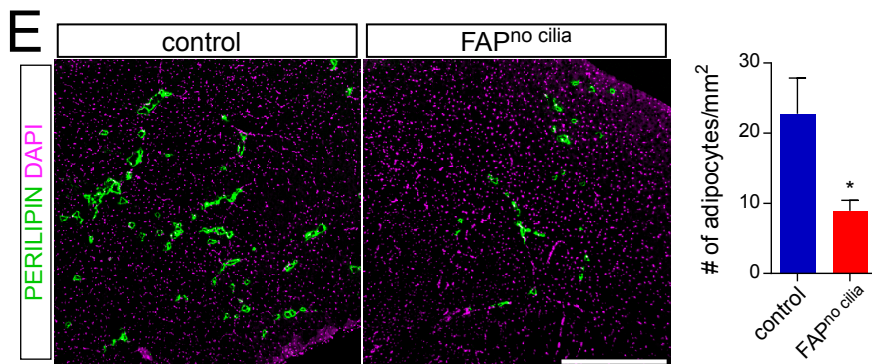

Supplement: NIHMS889975-supplement-2.pdf [file NIHMS889975-supplement-2.pdf]

A

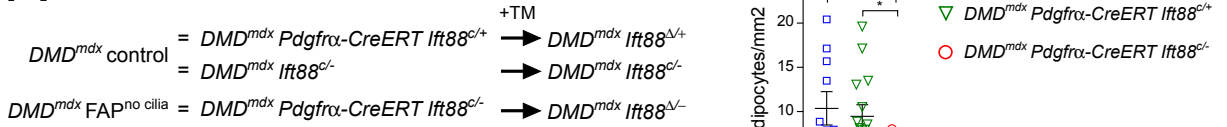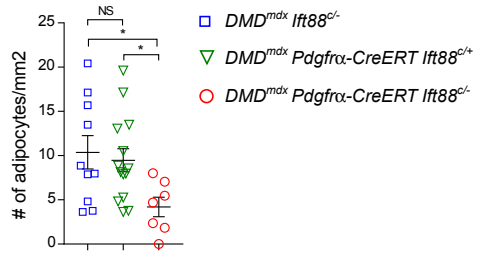

B

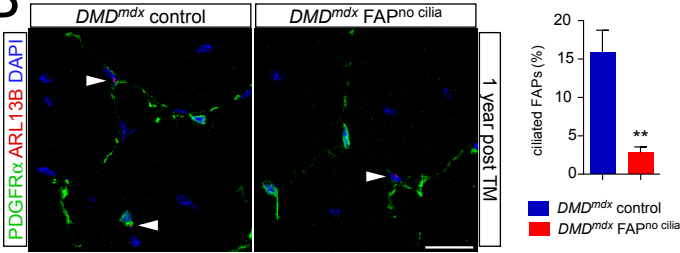

C

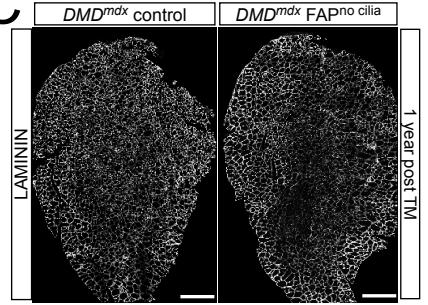

D

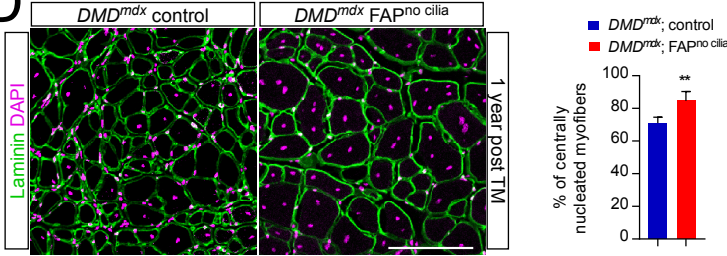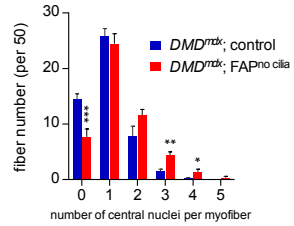

E

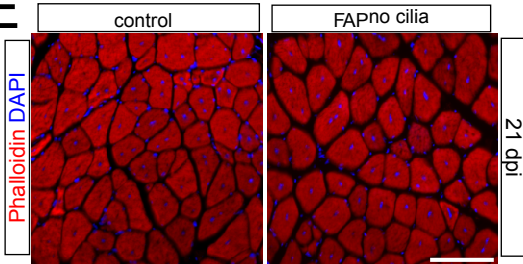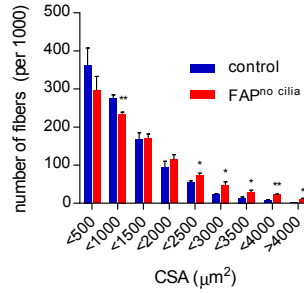

F

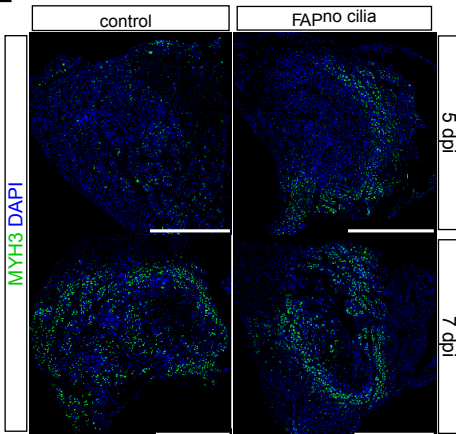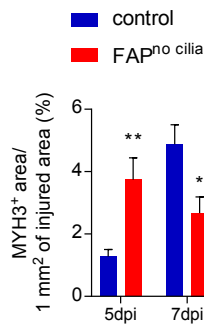

Supplement: NIHMS889975-supplement-3.pdf [file NIHMS889975-supplement-3.pdf]

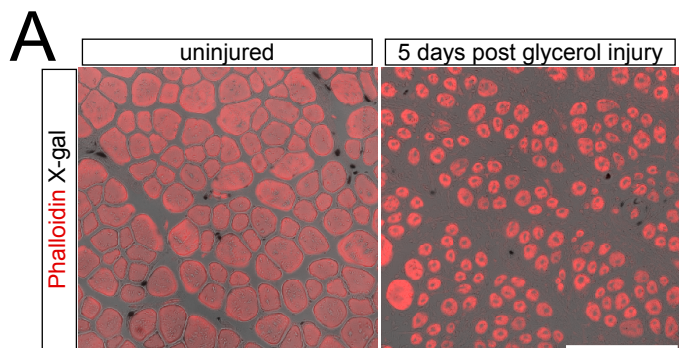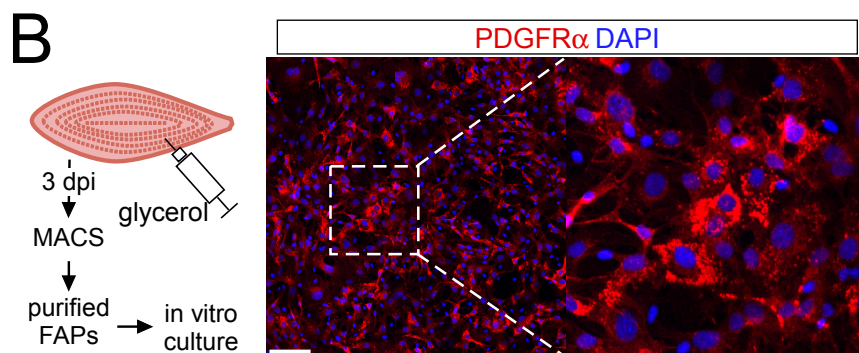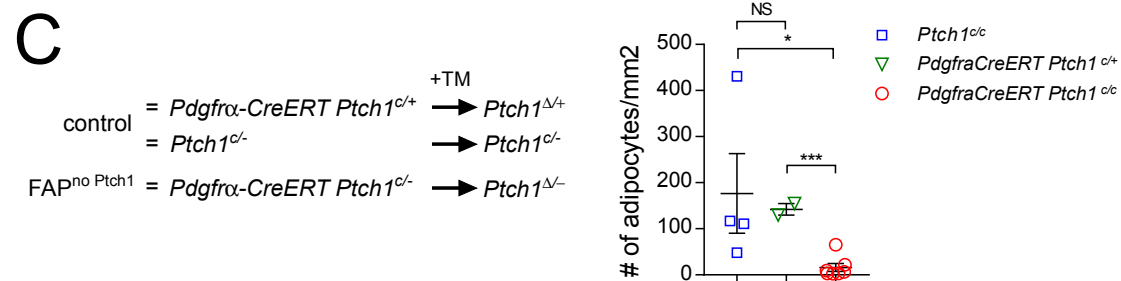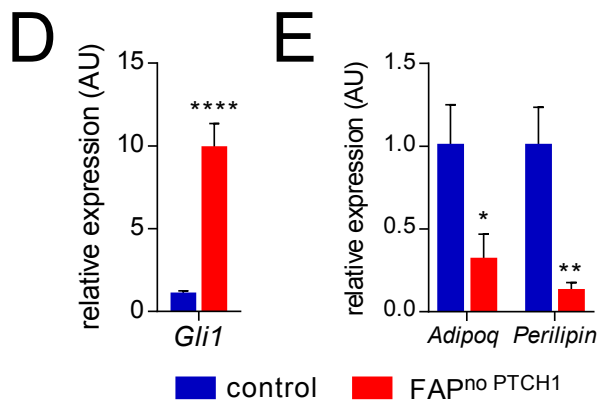

Supplement: NIHMS889975-supplement-4.pdf [file NIHMS889975-supplement-4.pdf]

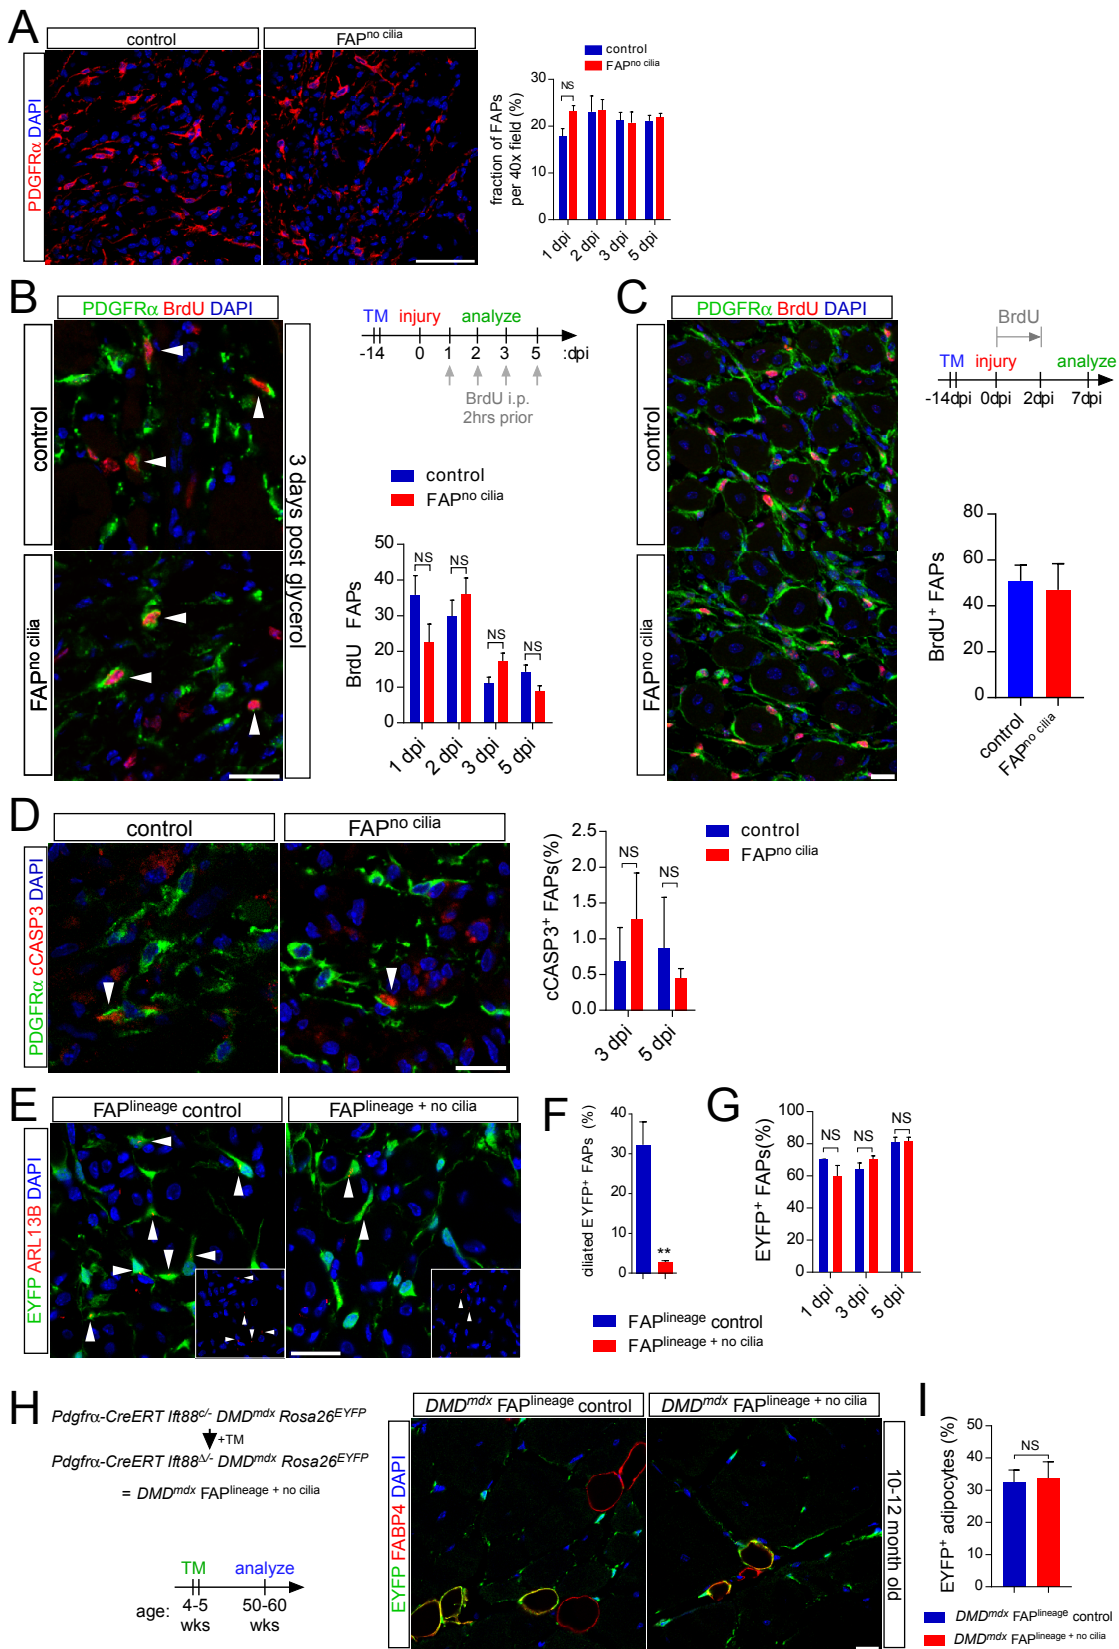

Supplement: NIHMS889975-supplement-5.pdf [file NIHMS889975-supplement-5.pdf]

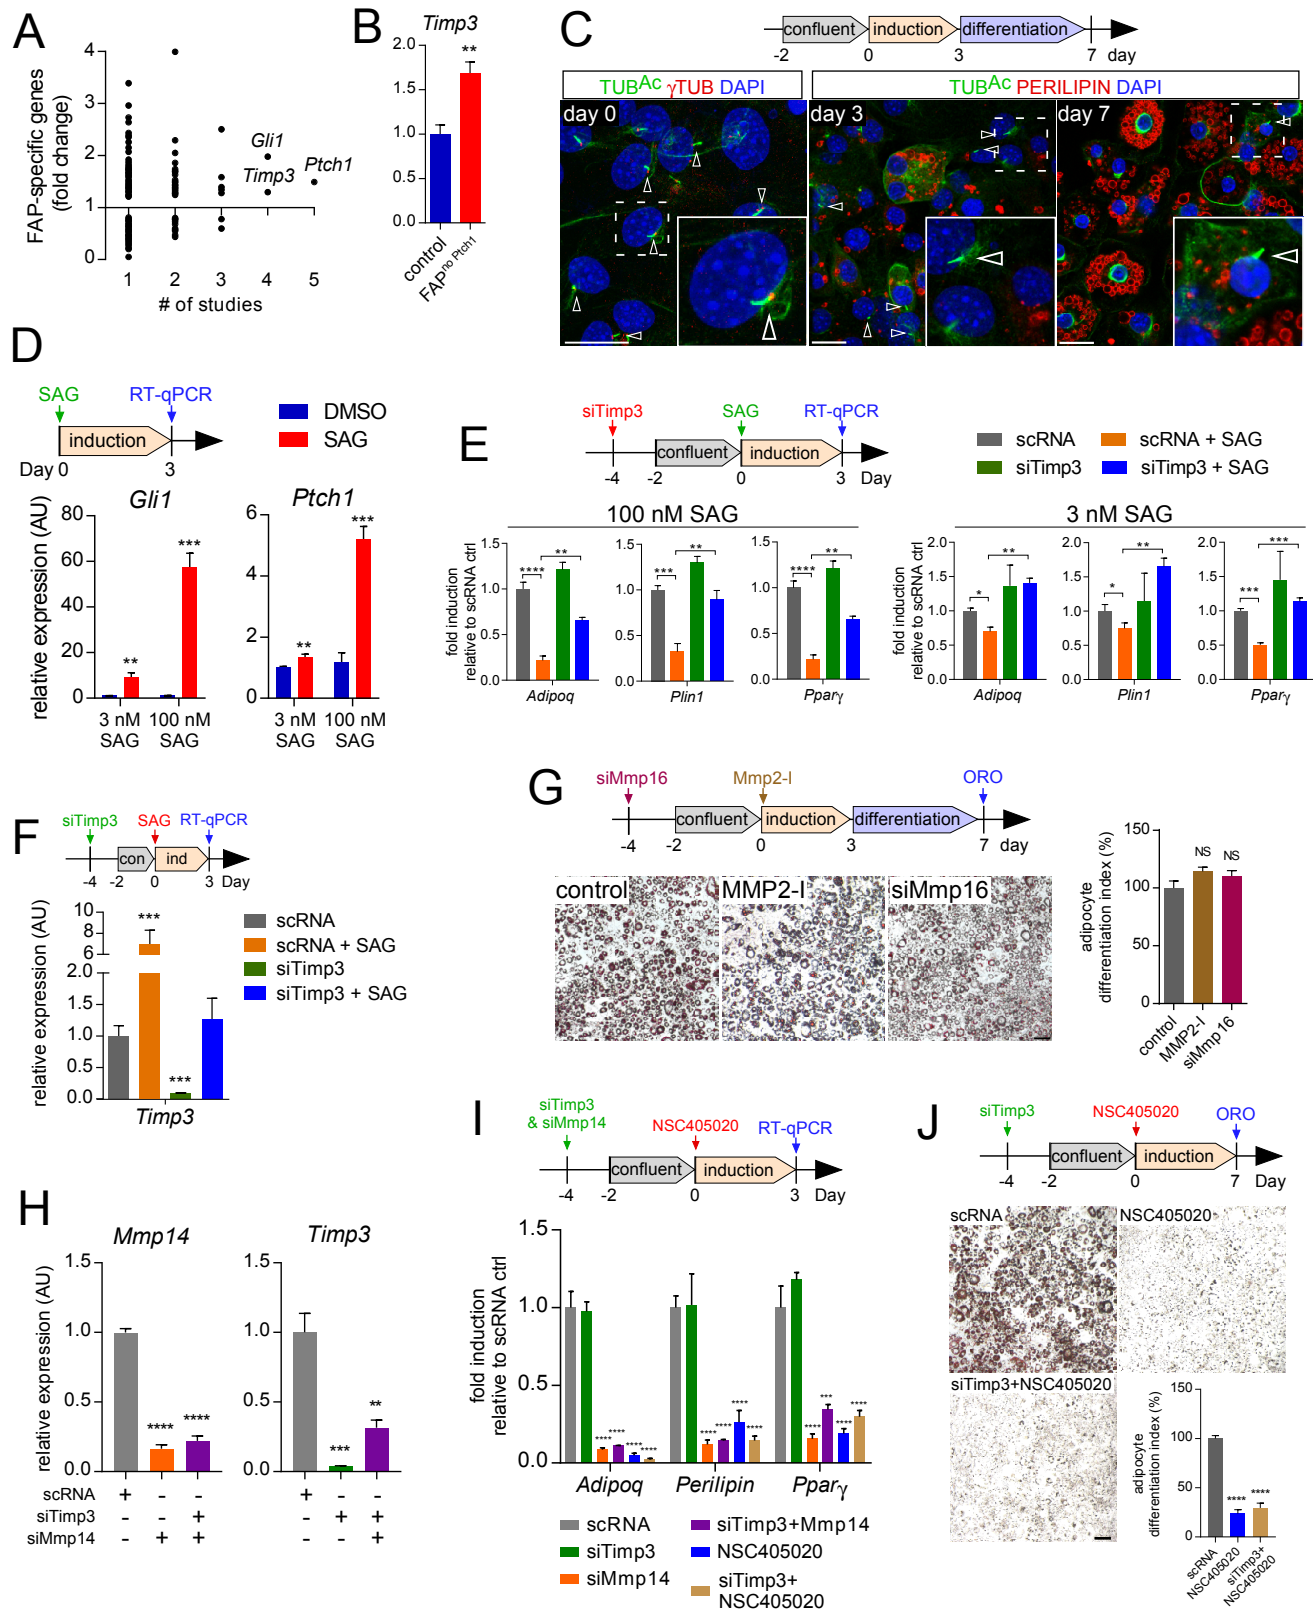

Supplement: NIHMS889975-supplement-6.pdf [file NIHMS889975-supplement-6.pdf]
